# Supplementary material
Source: MDPI journal article supplement (https://www.mdpi.com/1424-2818/13/6/276)
Supplement: s1 [file s1]

## Supplementary Material

# Genetic diversity of ancient *Camellia sinensis* (L.)O.Kuntze in Sandu County of Guizhou Provinc in China

Yichen Zhao<sup>1\*</sup>, Runying Wang<sup>2</sup>, Qing Liu<sup>2</sup>, Xuan Dong<sup>1</sup>, De-Gang Zhao<sup>1, 3</sup>

<sup>1</sup> College of Tea Sciences, The Key Laboratory of Plant Resources Conservation and Germplasm Innovation in Mountainous Region (Ministry of Education), Guizhou University, Guiyang 550025, China; yczhao@gzu.edu.cn (Y.Z.); xdong@gzu.edu.cn (X.D.)

<sup>2</sup> College of Life Sciences, Guizhou University, Guiyang 550025, Guizhou, China; gs.runyingwang19@gzu.edu.cn (R.W.); lq20210603@163.com (Q.L.)

<sup>3</sup> Guizhou Academy of Agricultural Science, People's Republic of China, Guiyang 550006, Guizhou, China; dgzhao@gzu.edu.cn (D.-G.Z.)

\* For correspondence: yczhao@gzu.edu.cn

**Table S1** Standardized treatment and assignment of phenotypic characters of the tea plant leaves used for diversity analysis

| Number | Phenotypic character | Data assignment                                                        |
|--------|----------------------|------------------------------------------------------------------------|
| 1      | Tree form            | Arbor (1); Semiarbors (2); Bush (3)                                    |
| 2      | Leaf shape           | Suborbicular (1); Oval (2); Long oval (3); lanceolate (4)              |
| 3      | Leaf size            | lobules (1); middle leaves (2); large leaves (3); oversized leaves (4) |
| 4      | Leaf texture         | Soft (1); Hard (2)                                                     |
| 5      | Leaf apex            | Acute (1); Taper (2); Obtuse (3)                                       |
| 6      | Leaf tooth depth     | Shallow (1); Medium (2); Deep (3)                                      |
| 7      | Leaf colour          | Bottle green (1); Green (2); Yellow green (3)                          |

Leaf area = leaf length \* leaf width \*0.7. Leaf area greater than 60 cm<sup>2</sup> is very large, leaf area between 40 and 60 cm<sup>2</sup> is large, leaf area between 20 and 40 cm<sup>2</sup> is middle, and leaf area less than 20 cm<sup>2</sup> is lobular. Leaf shape index = leaf length/leaf width. If the leaf shape index is less than 2.0, it is subcircular; if the leaf shape index is 2.0~2.5, it is elliptic; if the leaf shape index is 2.5~3.0, it is long elliptic; if the leaf shape index is greater than 3.0, it is lanceolate.

**Table S2** Statistical analysis of the seven qualitative characters of 145 ancient tea plant germplasm used for diversity analysis of phenotypic characters

| Items   | Tree<br>form | Leaf<br>texture | Leaf<br>apex | Leaf<br>shape | Leaf<br>size | Leaf<br>tooth<br>depth | Leaf<br>colour |
|---------|--------------|-----------------|--------------|---------------|--------------|------------------------|----------------|
| Maximum | 3            | 2               | 3            | 4             | 4            | 3                      | 3              |
| Minimum | 1            | 1               | 1            | 1             | 1            | 1                      | 1              |
| Mean    | 2.37         | 1.86            | 1.57         | 2.63          | 1.88         | 1.51                   | 1.72           |
| SD      | 0.87         | 0.35            | 0.69         | 0.67          | 0.58         | 0.76                   | 0.70           |
| CV (%)  | 36.8<br>2    | 18.58           | 44.18        | 25.35         | 30.70        | 50.64                  | 40.01          |
| H       | 0.77         | 0.55            | 0.81         | 0.83          | 0.76         | 0.78                   | 0.84           |

SD-Standard deviation; CV- the variation coefficients; H- diversity indices

**Table S3** Statistical analysis of the six quantitative characters of 145 ancient tea plant germplasm used for diversity analysis of phenotypic characters

| Items   | Leaf veins<br>logarithmic | Leaf teeth<br>logarithmic | Height<br>of tree | Leaf<br>area | Length<br>of leaf | Leaf<br>width |
|---------|---------------------------|---------------------------|-------------------|--------------|-------------------|---------------|
| Maximum | 13.67                     | 41.67                     | 12                | 70.72        | 16.53             | 6.10          |
| Minimum | 4.33                      | 6.33                      | 0.70              | 8.58         | 5.03              | 2.43          |
| Mean    | 8.70                      | 24.91                     | 4.45              | 27.9         | 9.89              | 3.90          |
| SD      | 1.55                      | 7.23                      | 2.69              | 9.87         | 1.93              | 0.7           |
| CV (%)  | 17.76                     | 29.02                     | 60.37             | 35.37        | 19.53             | 17.91         |
| H       | 1.72                      | 2.66                      | 2.17              | 2.74         | 2.50              | 2.26          |

SD-Standard deviation; CV- the variation coefficients; H- diversity indices

**Table S4** Variation coefficients of the phenotypic characters of five populations of ancient tea plant germplasm used for diversity analysis

| Characters \ Sites           | Zenya<br>village<br>(arbor)(%) | Yangmeng<br>village<br>(arbor)(%) | Landong<br>village<br>(arbor)(%) | Landong<br>Village<br>(bush)(%) | Guqi<br>village<br>(bush)(%) |
|------------------------------|--------------------------------|-----------------------------------|----------------------------------|---------------------------------|------------------------------|
| Tree shape                   | 6.43                           | 22.59                             | 17.06                            | -                               | -                            |
| Leaf texture                 | 24.53                          | -                                 | 7.62                             | -                               | 26.39                        |
| Leaf apex                    | 30.84                          | 41.70                             | 39.06                            | 50.67                           | 55.36                        |
| Leaf shape                   | 25.66                          | 19.57                             | 24.51                            | 25.26                           | 24.27                        |
| Leaf size                    | 27.05                          | 23.57                             | 23.94                            | 31.05                           | 19.19                        |
| Leaf tooth depth             | 57.77                          | 48.43                             | 34.54                            | 45.71                           | 40.18                        |
| Leaf colour                  | 39.71                          | 55.80                             | 34.81                            | 36.14                           | 40.96                        |
| Veins logarithmic            | 18.98                          | 20.77                             | 11.38                            | 24.68                           | 13.26                        |
| Leaves teeth<br>logarithmic  | 26.61                          | 22.68                             | 23.46                            | 20.20                           | 18.07                        |
| Height of tree (m)           | 41.27                          | 29.81                             | 38.32                            | 43.30                           | 42.37                        |
| Length of leaf (cm)          | 15.87                          | 11.56                             | 14.17                            | 18.68                           | 15.60                        |
| Leaf width (cm)              | 13.81                          | 12.19                             | 15.42                            | 14.63                           | 13.05                        |
| Leaf area (cm <sup>2</sup> ) | 27.58                          | 28.37                             | 26.63                            | 33.34                           | 23.76                        |
| Mean                         | 27.39                          | 25.93                             | 23.92                            | 26.44                           | 25.57                        |

**Table S5** Diversity index(H) of phenotypic characters of five populations of ancient tea plant germplasm used for diversity analysis

| Characters \ Sites           | Zenya<br>village<br>(arbor) | Yangmeng<br>village<br>(arbor) | Landong<br>village<br>(arbor) | Landong<br>village<br>(bush) | Guqi<br>village<br>(bush) |
|------------------------------|-----------------------------|--------------------------------|-------------------------------|------------------------------|---------------------------|
| Tree shape                   | 0.158                       | 0.325                          | 0.607                         | -                            | -                         |
| Leaf texture                 | 0.552                       | -                              | 0.109                         | -                            | 0.586                     |
| Leaf apex                    | 0.733                       | 1.089                          | 0.610                         | 0.861                        | 0.677                     |
| Leaf shape                   | 0.936                       | 0.802                          | 1.021                         | 0.882                        | 0.846                     |
| Leaf size                    | 0.608                       | 0.639                          | 0.765                         | 0.393                        | 0.485                     |
| Leaf tooth depth             | 0.506                       | 1.030                          | 0.536                         | 1.085                        | 1.084                     |
| Leaf colour                  | 1.007                       | 0.898                          | 1.002                         | 0.580                        | 0.819                     |
| Leaf veins                   |                             |                                |                               |                              |                           |
| logarithmic                  | 2.692                       | 1.887                          | 2.247                         | 2.431                        | 2.221                     |
| Leaf teeth                   |                             |                                |                               |                              |                           |
| logarithmic                  | 3.333                       | 2.164                          | 3.394                         | 2.488                        | 2.902                     |
| Height of tree (m)           | 2.870                       | 2.164                          | 3.343                         | 1.876                        | 2.284                     |
| Length of leaf (cm)          | 3.723                       | 2.303                          | 3.552                         | 2.616                        | 2.965                     |
| Leaf width (cm)              | 3.267                       | 2.164                          | 3.319                         | 2.523                        | 2.902                     |
| Leaf area (cm <sup>2</sup> ) | 3.989                       | 2.303                          | 3.784                         | 2.708                        | 3.028                     |
| Mean                         | 1.870                       | 1.370                          | 1.870                         | 1.420                        | 1.600                     |

**Table S6** Eigenvectors and contribution rates of the principal components of 13 phenotypic characters

| Principal components | Eigenvalue | Contribution (%) | Cumulative (%) |
|----------------------|------------|------------------|----------------|
| PC1                  | 4.226      | 32.505           | 32.505         |
| PC2                  | 2.066      | 15.891           | 48.396         |
| PC3                  | 1.768      | 13.598           | 61.994         |
| PC4                  | 1.222      | 9.401            | 71.395         |
| PC5                  | 0.988      | 7.596            | 78.991         |
| PC6                  | 0.844      | 6.491            | 85.482         |

**Table S7** Genetic concordances estimates in the 145 ancient tea plant germplasm by using 15 SSR markers

| Samples                                    | Numerical | Maximum and Number         | Minimum and Number         |
|--------------------------------------------|-----------|----------------------------|----------------------------|
|                                            |           |                            |                            |
| Genetic concordance between arbor          |           | 0.9529±0.0496<br>(37-25)   | 0.5882±0.0295<br>(102-48)  |
| Genetic concordance between bush           |           | 0.9294±0.0212<br>(126-124) | 0.6118±0.0148<br>(132-113) |
| Genetic concordance between arbor and bush |           | 0.9176±0.0220<br>(108-105) | 0.5765±0.0038<br>(127-48)  |



**Table S8** Genetic distance estimates in the 145 ancient tea plant germplasm by using 15 SSR markers

| Samples                                    | Numerical | Maximum and Number         | Minimum and Number         |
|--------------------------------------------|-----------|----------------------------|----------------------------|
|                                            |           |                            |                            |
| Genetic concordance between arbor          |           | 0.5306±0.0477<br>(48-102)  | 0.0482±0.0088<br>(25-37)   |
| Genetic concordance between bush           |           | 0.4914±0.0211<br>(132-113) | 0.0732±0.0257<br>(126-124) |
| Genetic concordance between arbor and bush |           | 0.5508±0.0056<br>(127-48)  | 0.0859±0.0295<br>(108-105) |

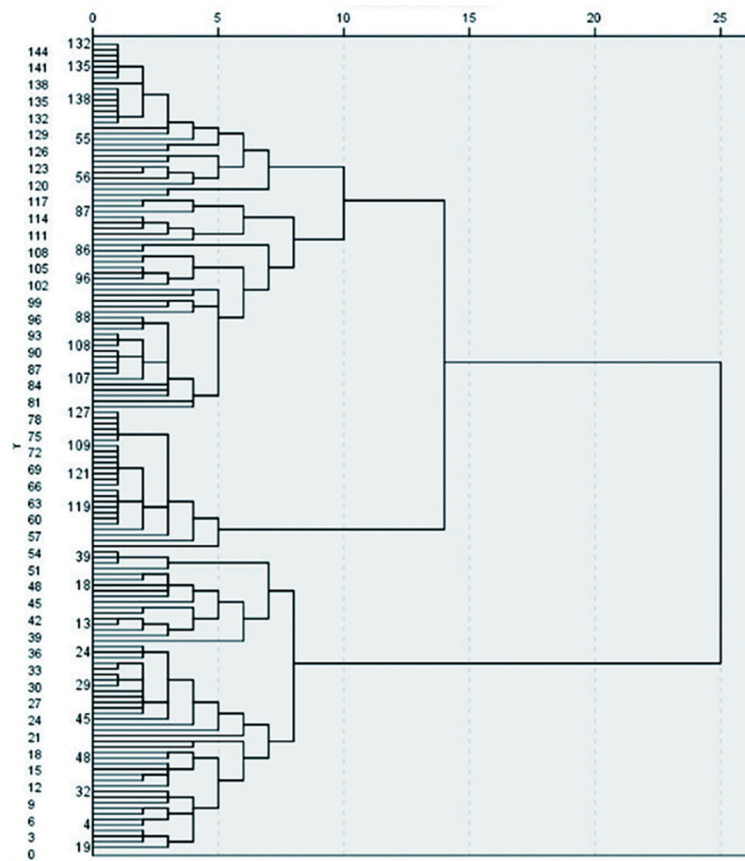

**Figure S1** Cluster diagram of phenotypic traits showing clustering relationship of 145 samples of ancient tea plant germplasm

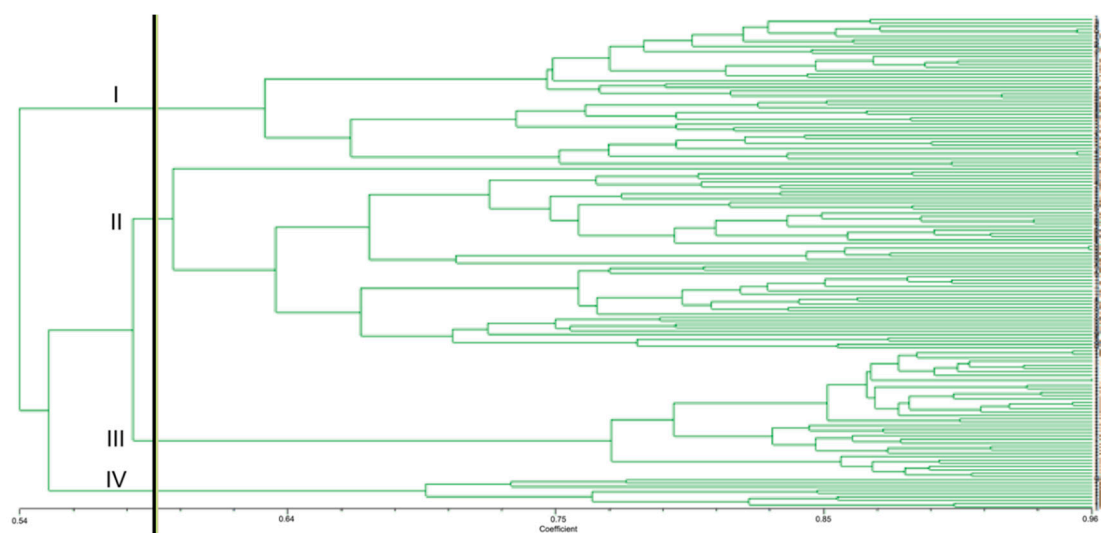

**Figure S2** Classification and identification of 145 samples of ancient tea plant germplasm showing genetic relationship based on 15 SSR markers
